# Supplementary material for: Socioeconomic factors affecting postpartum mental health in mothers referred to a hospital in yasuj, southwestern Iran
Source: Research Square preprint supplement (doi:10.21203/rs.3.rs-5980006/v1), 2025-04-16
Supplement: Supplementary file 1 [file c93c510c50a3ad66fa53df8d.docx]

**Supplementary 1**

**Demographic information and socio-economic factors questionnaire**

1. **Age:** …………..
2. **Education level:**  Sub-diploma ⬜ Diploma ⬜ Bachelor ⬜ Advanced Education ⬜
3. **Occupation:** Employed ⬜ Self-Employed ⬜ Housewife ⬜ Student ⬜
4. **Place of birth:** Urban ⬜ Rural ⬜
5. **Place of residence:** Urban ⬜ Rural ⬜
6. **Basic insurance coverage status:** Iran Health Insurance Organization (IHIO) ⬜ Social Security Organization (SSO) ⬜ Armed Forces Insurance (AFI) ⬜
7. **Supplementary Health Insurance:** Yes ⬜ No ⬜
8. **Housing situation:** Rental ⬜ Personal owner ⬜ Organizational ⬜
9. **Household income (Monthly):** Weak ⬜ Moderate ⬜ Good ⬜
10. **Smoking:** Yes ⬜ No ⬜
11. **Debt or financial pressure of the head of the household:** Yes ⬜ No ⬜
12. **Number of births:** ……………
13. **Type of delivery:** Natural ⬜ Cesarean ⬜
